# Supplementary material for: circ-0000212 promotes cell proliferation of colorectal cancer by sponging miR-491 and modulating FOXP4 expression
Source: PubMed Central journal article supplement — Mol Med Rep. 2021 Feb 24;23(4):300. doi: 10.3892/mmr.2021.11939 (PMC7930931; doi:10.3892/mmr.2021.11939), 2021-02-24

Figure S1. Patients were divided into two groups based on the median value of miR-491 or FOXP4 expression. There was no association between survival of patients with (A) FOXP4 or (B) miR-491. miR-491, microRNA-491; FOXP4, forkhead box P4.

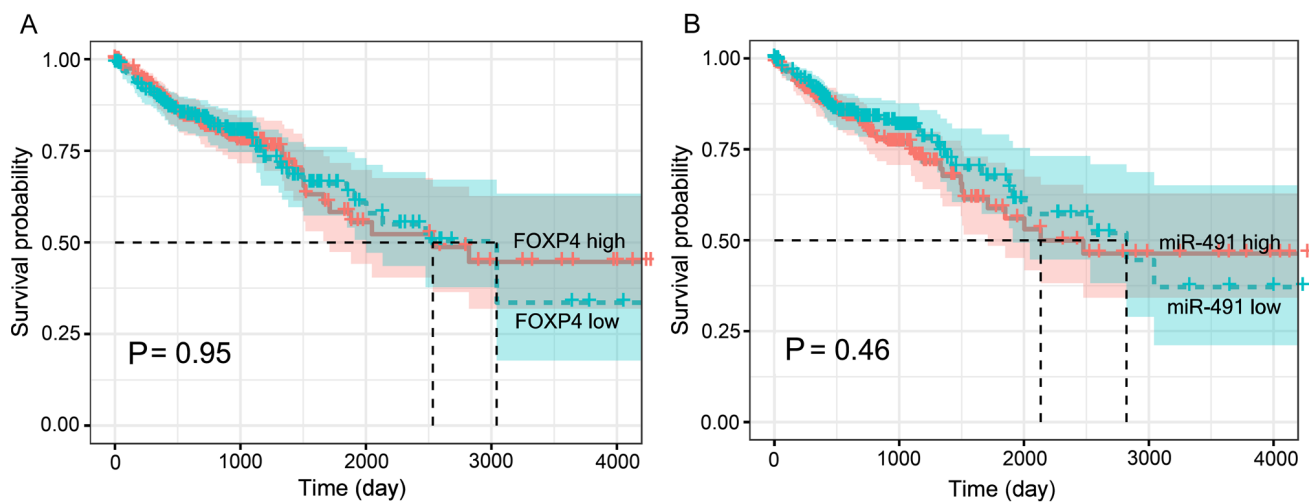

Figure S2. (A) FOXP4 was significantly upregulated after transfection with FOXP4 Ov plasmid. (B) miR-491 was inhibited after transfection with miR-491 Inh. (C) circ-0000212 was dramatically inhibited after transfection of si-circ. \* $P < 0.05$ , \*\* $P < 0.01$ , as indicated. NC, negative control; Ov, overexpression; FOXP4, forkhead box P4; miR-491, microRNA-491; Inh, inhibitor; circ, circular RNA; si, small interfering.

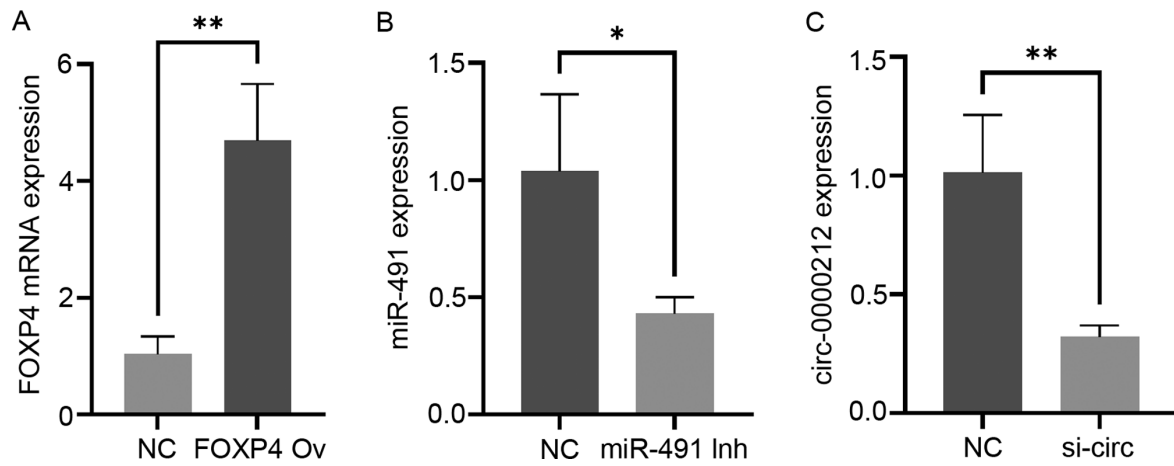

Supplement: Supplementary_Data1.pdf [file Supplementary_Data1.pdf]
